# Supplementary material
Source: Springer Nature journal article supplement (https://www.springermedizin.de/resource/supplementary/13058_2013_3568_MOESM2_ESM.pdf/9703656)
Supplement: MOESM2 [file 9703656]

|                               |                                                                                         | GEM Dataset |             |             |               | NHS Dataset |             |             |                  |
|-------------------------------|-----------------------------------------------------------------------------------------|-------------|-------------|-------------|---------------|-------------|-------------|-------------|------------------|
| Aim                           | Analysis                                                                                | Data Source | Sample Size | Genome wide | Analyte(s)    | Data Source | Sample Size | Genome wide | Analyte(s)       |
| Patterns of ER/PR Expression  | Freq. of ER/PR subtypes                                                                 | GEM         | 4,111       | No          | mRNA          | MR          | 2,011       | No          | Protein          |
|                               | Freq. of ER/PR subtypes                                                                 | MR          | 1,752       | No          | Protein       | TMA         | 2,011       | No          | Protein          |
|                               | <i>PGR</i> variability in ER+ and ER-                                                   | GEM         | 3,666       | Yes         | mRNA          |             |             |             |                  |
| ER/PR Subtype Reproducibility | Inter-assay Reproducibility                                                             | GEM, MR     | 1,752       | No          | mRNA, Protein | MR, TMA     | 2,011       | No          | Protein, Protein |
| ER/PR and Survival            | <i>ESR1</i> and <i>PGR</i> prognostic association in univariate and multivariate models | GEM         | 975         | No          | mRNA          | TMA         | 2,011       | No          | Protein          |
|                               | ER and PR prognostic association in univariate and multivariate models                  | MR          | 465         | No          | Protein       | MR          | 2,011       | No          | Protein          |
|                               | <i>PGR</i> prognostic association in ER+ and ER-                                        | GEM         | 2,731       | Yes         | mRNA          |             |             |             |                  |
